# Supplementary material for: Zeolitic-imidazolate framework derived Ni–Co layered double hydroxide hollow microspheres with enhanced pseudocapacitive properties for hybrid supercapacitors
Source: Royal Society of Chemistry journal article supplement (doi:10.1039/d1tc05792h), 2022-01-01
Supplement: d1tc05792h1.pdf [file d1tc05792h1.pdf]

## Supporting Information

### Zeolitic-imidazolate frameworks derived Ni-Co layered double hydroxide hollow microspheres with enhanced pseudocapacitive properties for hybrid supercapacitors

Xu Li <sup>a, b</sup>, Shuangyi Liu <sup>b</sup>, Sihan Bai <sup>b</sup>, Zhenhu Li <sup>\*b</sup>, Jun Shen <sup>\*a</sup>

<sup>a</sup>State Key Laboratory of Mechanical Transmission, College of Materials Science and Engineering, Chongqing University, Chongqing, 400044, P.R. China

<sup>b</sup>Chongqing Key Laboratory of Multi-Scale Manufacturing Technology, Chongqing Institute of Green and Intelligent Technology, Chinese Academy of Sciences, Chongqing 400714, P.R. China

Email: shenjun@cqu.edu.cn; lizhenhu@cigit.ac.cn

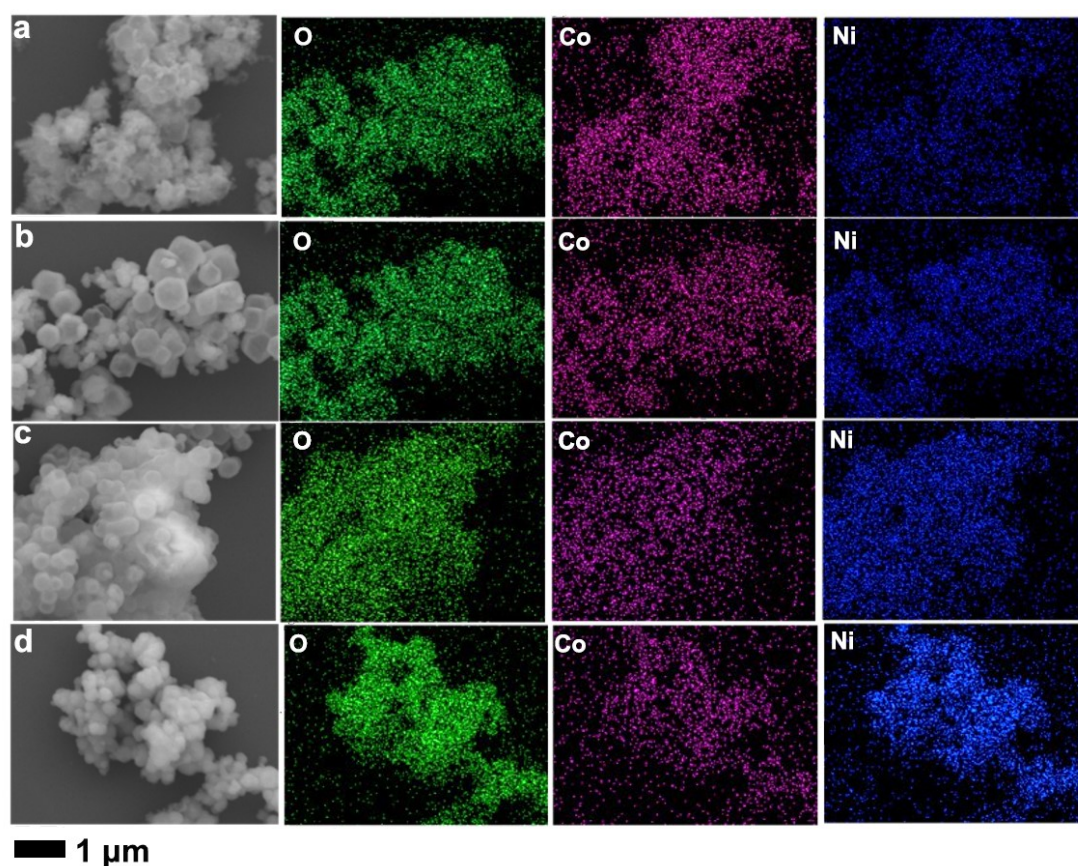

Figure S1 EDS elemental mapping images of O, Co and Ni of (a) Ni-Co-LDH-C-1:4, (b) Ni-Co-LDH-C-1:1, (c) Ni-Co-LDH-C-2:1 and (d) Ni-Co-LDH-C-4:1.

Table S1 The ratio of Ni and Co atomic ratio of Ni-Co-LDH-C-1:4, Ni-Co-LDH-C-1:1, Ni-Co-LDH-C-2:1 and Ni-Co-LDH-C-4:1 determined by ICP-OES.

| Sample          | Ni (Atomic %) | Co (Atomic %) | Ni / Co atomic ratio |
|-----------------|---------------|---------------|----------------------|
| Ni-Co-LDH-C-1:4 | 22.8          | 77.2          | 1:3.4                |
| Ni-Co-LDH-C-1:1 | 57.8          | 42.2          | 1.4:1                |
| Ni-Co-LDH-C-2:1 | 67.7          | 32.3          | 2.1:1                |
| Ni-Co-LDH-C-4:1 | 81.8          | 18.2          | 4.5:1                |

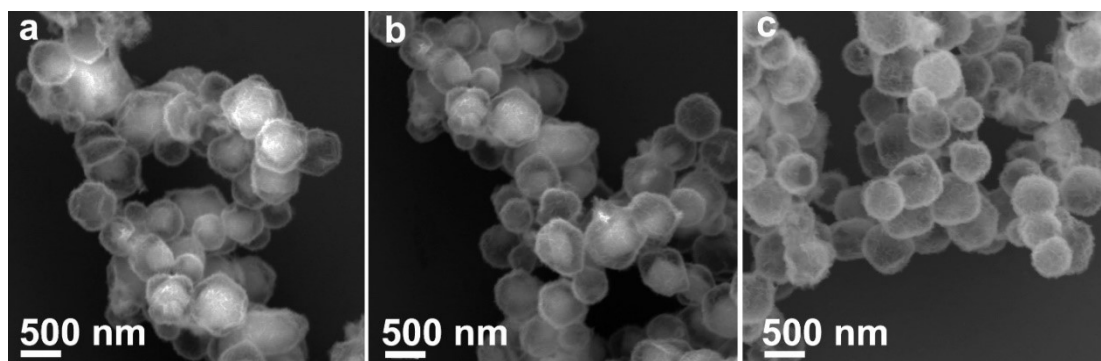

Figure S2 Time-dependent SEM images of the products collected at different reaction stages: Ni-Co-LDH-C-4:1 for 20 min (a), 40 min (b) and 2 h (c).

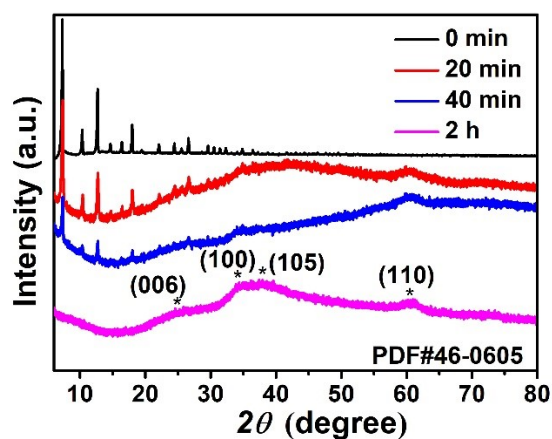

Figure S3 XRD patterns of Ni-Co-LDH-C-4:1 collected at different reaction stages.

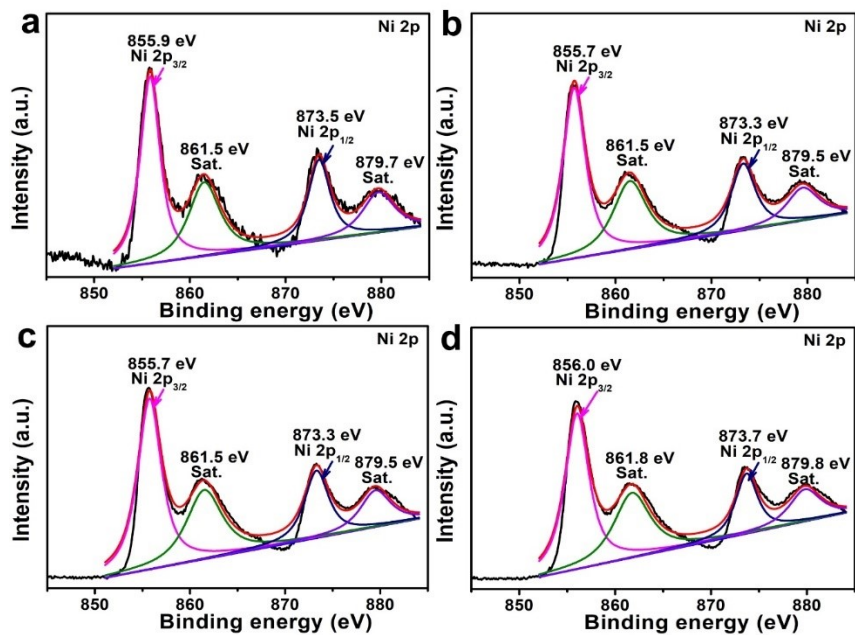

Figure S4 The high resolution XPS spectra for Ni 2p of (a) Ni-Co-LDH-C-1:4, (b) Ni-Co-LDH-C-1:1, (c) Ni-Co-LDH-C-2:1 and (d) Ni-Co-LDH-C-4:1.

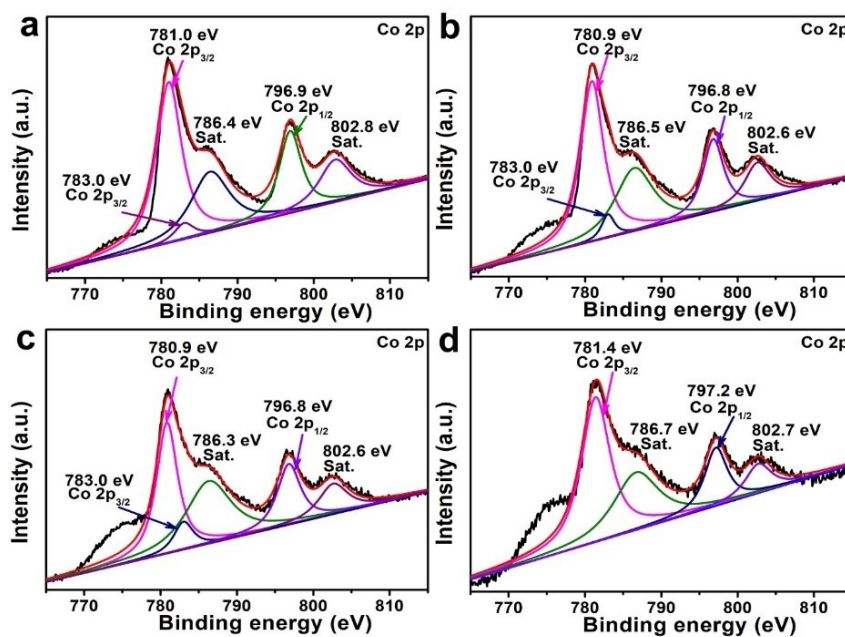

Figure S5 The high resolution XPS spectra for Co 2p of (a) Ni-Co-LDH-C-1:4, (b) Ni-Co-LDH-C-1:1, (c) Ni-Co-LDH-C-2:1 and (d) Ni-Co-LDH-C-4:1.

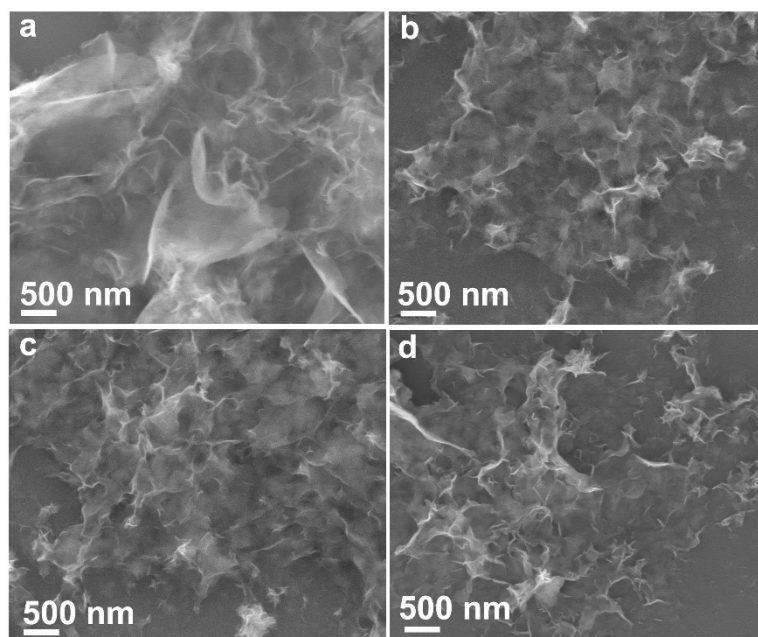

Figure S6 Morphology characterizations of (a) Ni-Co-LDH-W-1:4, (b) Ni-Co-LDH-W-1:1, (c) Ni-Co-LDH-W-2:1 and (d) Ni-Co-LDH-W-4:1.

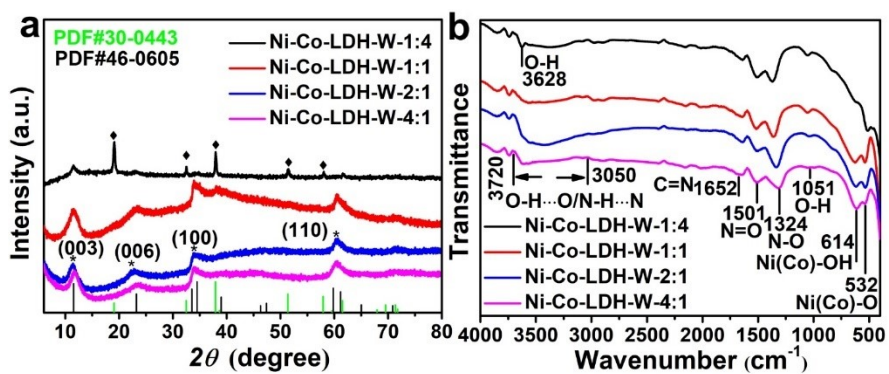

Figure S7 Characterizations of Ni-Co-LDH-W-1:4, Ni-Co-LDH-W-1:1, Ni-Co-LDH-W-2:1 and Ni-Co-LDH-W-4:1. (a) XRD patterns. (b) FT-IR spectra at the wavenumber of 4000-400  $\text{cm}^{-1}$ .



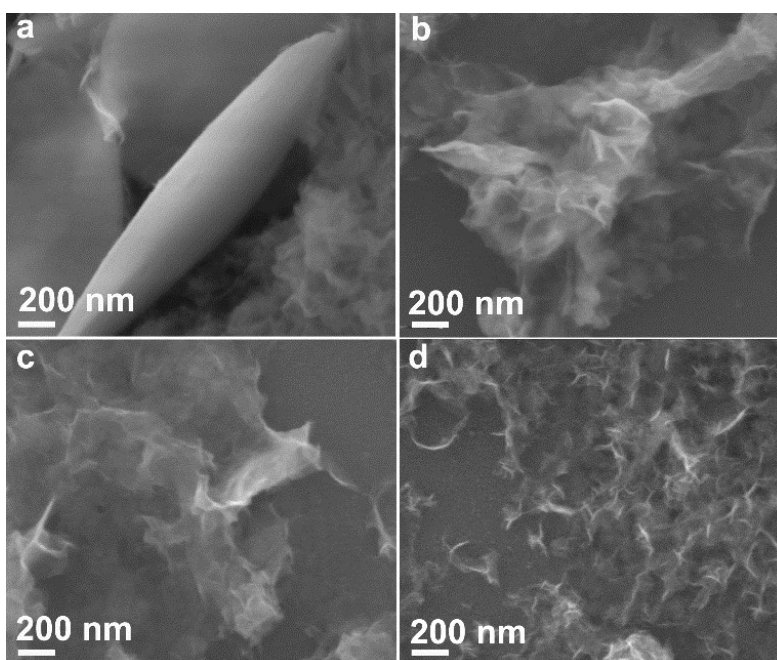

Figure S8 Morphology characterizations of (a) Ni-Co-LDH-L-1:4, (b) Ni-Co-LDH-L-1:1, (c) Ni-Co-LDH-L-2:1 and (d) Ni-Co-LDH-L-4:1.

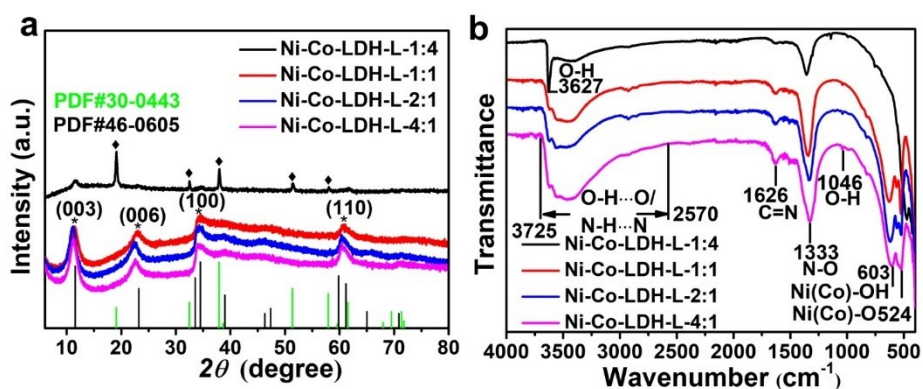

Figure S9 Characterizations of Ni-Co-LDH-L-1:4, Ni-Co-LDH-L-1:1, Ni-Co-LDH-L-2:1 and Ni-Co-LDH-L-4:1. (a) XRD patterns. (b) FT-IR spectra at the wavenumber of 4000-400  $\text{cm}^{-1}$ .

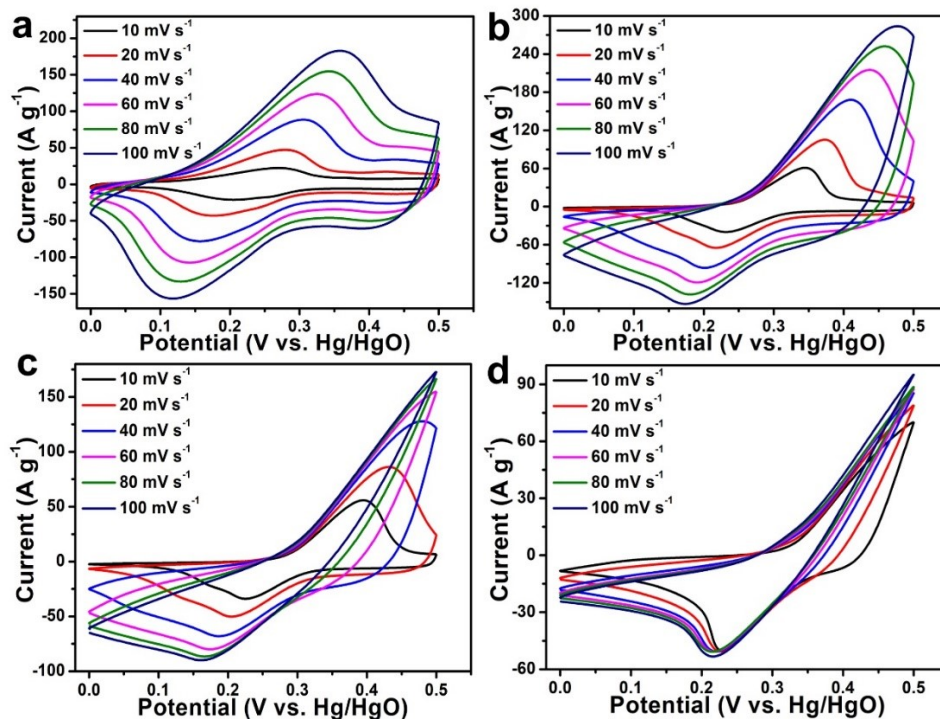

Figure S10 CV curves at different scan rates of (a) Ni-Co-LDH-C-1:4, (b) Ni-Co-LDH-C-1:1, (c) Ni-Co-LDH-C-2:1 and (d) Ni-Co-LDH-C-4:1 electrodes.

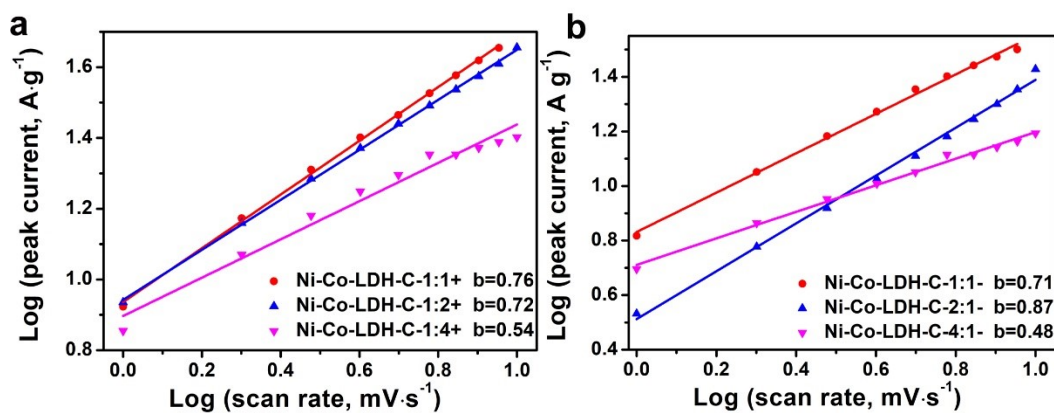

Figure S11 Normalized peak-current plot to determine the b value for anodic (a) and cathodic (b) process of Ni-Co-LDH-C-1:1, Ni-Co-LDH-C-2:1 and Ni-Co-LDH-C-4:1 electrodes.

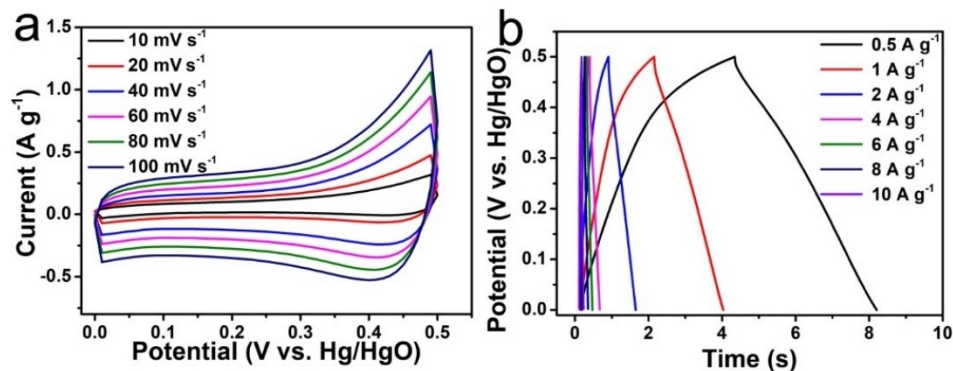

Figure S12 Electrochemical performances of Ni-Co-LDH-C-1:4 electrode. (a) CV curves at different scan rates and (b) GCD curves at different current densities.

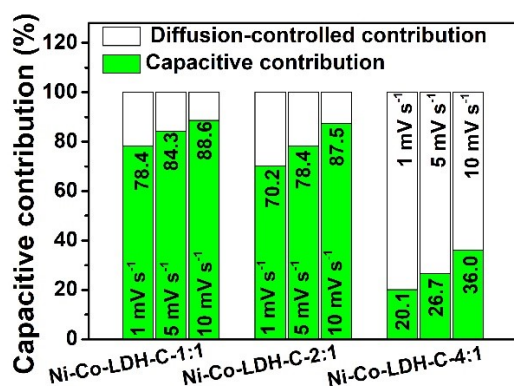

Figure S13 Normalized capacitive and diffusion-controlled contributions to charge storage at different scan rates of Ni-Co-LDH-C-1:1, Ni-Co-LDH-C-2:1 and Ni-Co-LDH-C-4:1 electrodes.

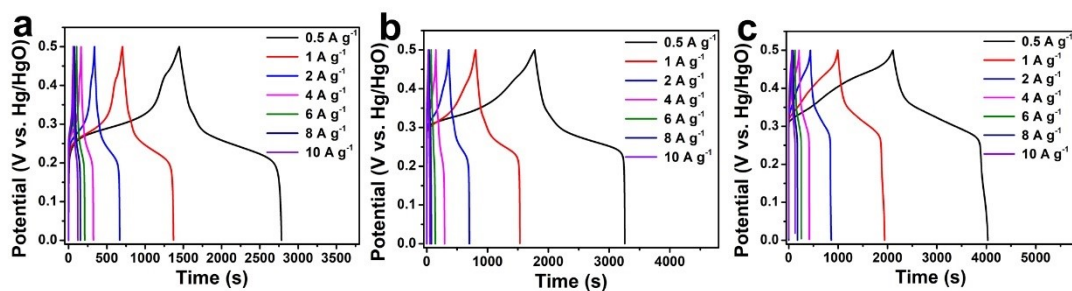

Figure S14 GCD curves at different current densities of (a) Ni-Co-LDH-C-1:1, (b) Ni-Co-LDH-C-2:1 and (c) Ni-Co-LDH-C-4:1 electrodes.

Table S2. Specific capacity at different current densities of Ni-Co-LDH-C-1:4, Ni-Co-LDH-C-1:1, Ni-Co-LDH-C-2:1 and Ni-Co-LDH-C-4:1 electrodes.

| Current density (A g <sup>-1</sup> ) | Ni-Co-LDH-C-1:4 (mAh g <sup>-1</sup> ) | Ni-Co-LDH-C-1:1 (mAh g <sup>-1</sup> ) | Ni-Co-LDH-C-2:1 (mAh g <sup>-1</sup> ) | Ni-Co-LDH-C-4:1 (mAh g <sup>-1</sup> ) |
|--------------------------------------|----------------------------------------|----------------------------------------|----------------------------------------|----------------------------------------|
| 0.5                                  | 137                                    | 193                                    | 206                                    | 263                                    |
| 1                                    | 135                                    | 185                                    | 202                                    | 255                                    |
| 2                                    | 134                                    | 183                                    | 189                                    | 243                                    |
| 4                                    | 132                                    | 178                                    | 177                                    | 223                                    |
| 6                                    | 127                                    | 174                                    | 171                                    | 202                                    |
| 8                                    | 126                                    | 170                                    | 162                                    | 182                                    |
| 10                                   | 124                                    | 166                                    | 157                                    | 164                                    |

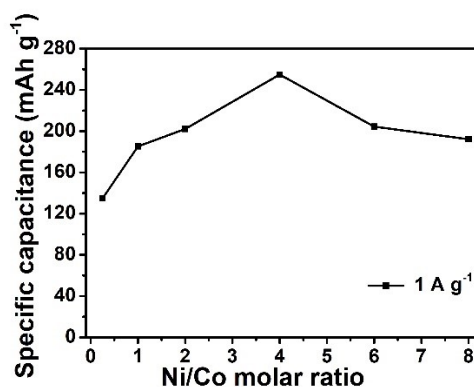

Figure S15 Rate capability varying curve with an increase in the Ni contents of Ni-Co-LDH-C-1:4, Ni-Co-LDH-C-1:1, Ni-Co-LDH-C-2:1, Ni-Co-LDH-C-4:1, Ni-Co-LDH-C-8:1 and Ni-Co-LDH-C-16:1 electrodes at 1 A g<sup>-1</sup>.

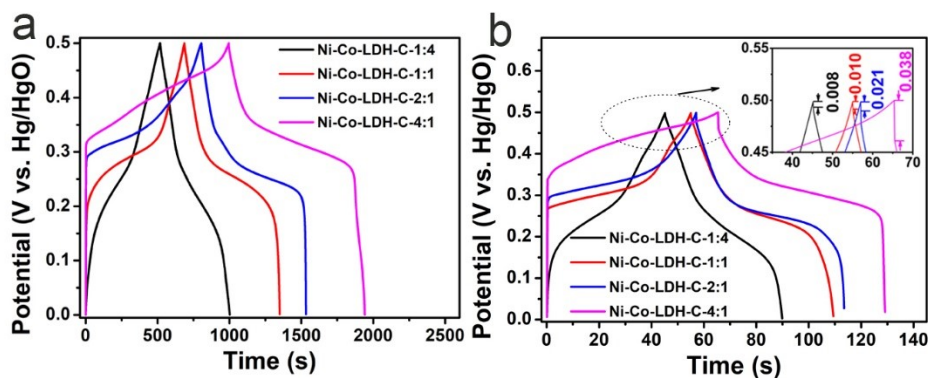

Figure S16 GCD curves of Ni-Co-LDH-C-1:4, Ni-Co-LDH-C-1:1, Ni-Co-LDH-C-2:1 and Ni-Co-LDH-C-4:1 electrodes at 1 A g<sup>-1</sup> (a) and 10 A g<sup>-1</sup> (b).



Table S3. Compared performance between Ni-Co-LDH-Cs and other reported materials of high stability.

| Materials                                                             | Cycle life            | Specific capacity/<br>capacitance                                       | Reference        |
|-----------------------------------------------------------------------|-----------------------|-------------------------------------------------------------------------|------------------|
| MnO <sub>2</sub> /NGCF                                                | 10 000 cycles (100%)  | 489.7 F g <sup>-1</sup> (1 A g <sup>-1</sup> )                          | [1]              |
| MnSe <sub>2</sub> /rGO                                                | 10 000 cycles (99.4%) | 326 F g <sup>-1</sup> (1.5 A g <sup>-1</sup> )                          | [2]              |
| CoP/P                                                                 | 10 000 cycles (99%)   | 422.4 C g <sup>-1</sup> (1 A g <sup>-1</sup> )                          | [3]              |
| NiCo <sub>2</sub> S <sub>4</sub> NFs@NiCo <sub>2</sub> S <sub>4</sub> | 4000 cycles (92%)     | 338.1 mAh g <sup>-1</sup> (1 A g <sup>-1</sup> )                        | [4]              |
| CeO <sub>2</sub> /NiV-LDH (2:2)//Bi <sub>2</sub> O <sub>3</sub>       | 10 000 cycles (86.4%) | 176 F g <sup>-1</sup> (2 A g <sup>-1</sup> )                            | [5]              |
| CoNi-LDH-350P@CFC//active carbon                                      | 3000 cycles (87.7%)   | 223 mAh g <sup>-1</sup> (0.5 A g <sup>-1</sup> )                        | [6]              |
| NiCo LDH/Co(OH) <sub>2</sub>                                          | 1000 cycles (92%)     | 2220.0 F g <sup>-1</sup> (1 A g <sup>-1</sup> )                         | [7]              |
| CNTs@NiCo-LDH//ZIF-8                                                  | 5200 cycles (90.22%)  | 176.33 mAh g <sup>-1</sup> (1 A g <sup>-1</sup> )                       | [8]              |
| CCCH@NiCo-LDH<br>NWAs@Au-CuO/Cu                                       | 30 000 cycles (90.8%) | 1237 F g <sup>-1</sup> (1 A g <sup>-1</sup> )                           | [9]              |
| NiCo-LDH/D-HNTs                                                       | 2000 cycles (80.8%)   | 1401.4 C g <sup>-1</sup> (1 A g <sup>-1</sup> )                         | [10]             |
| Ni-Co-LDH-C-1:4                                                       | 10 000 cycles (102%)  | 135 mAh g <sup>-1</sup> (972 F g <sup>-1</sup> , 1 A g <sup>-1</sup> )  | <b>This work</b> |
| Ni-Co-LDH-C-1:1                                                       | 10 000 cycles (89%)   | 185 mAh g <sup>-1</sup> (1332 F g <sup>-1</sup> , 1 A g <sup>-1</sup> ) |                  |
| Ni-Co-LDH-C-2:1                                                       | 10 000 cycles (79%)   | 202 mAh g <sup>-1</sup> (1454 F g <sup>-1</sup> , 1 A g <sup>-1</sup> ) |                  |
| Ni-Co-LDH-C-4:1                                                       | 10 000 cycles (59%)   | 255 mAh g <sup>-1</sup> (1836 F g <sup>-1</sup> , 1 A g <sup>-1</sup> ) |                  |

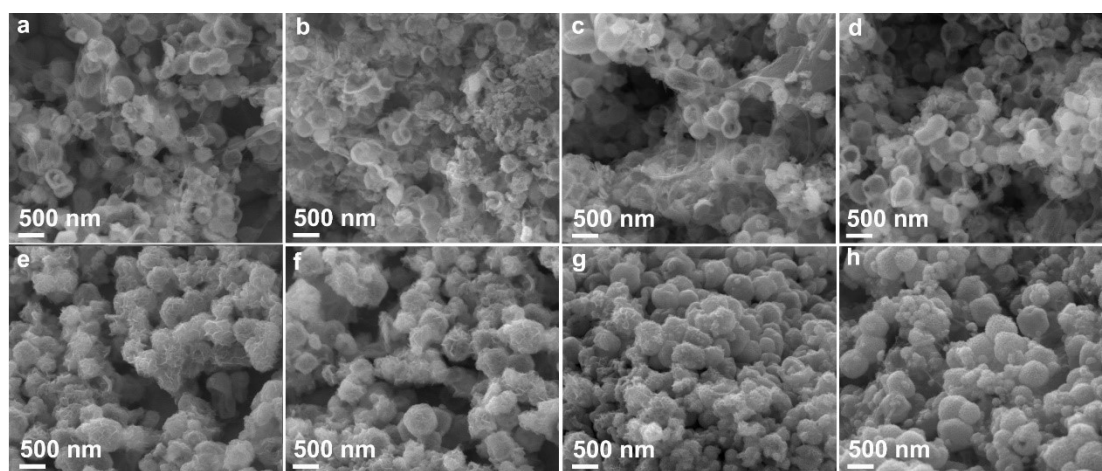

Figure S17 SEM images of Ni-Co-LDH-C-1:4, Ni-Co-LDH-C-1:1, Ni-Co-LDH-C-2:1 and Ni-Co-LDH-C-4:1 electrodes (a, b, c and d) and after the cycling test at 6 A g<sup>-1</sup>(e, f, g and h).

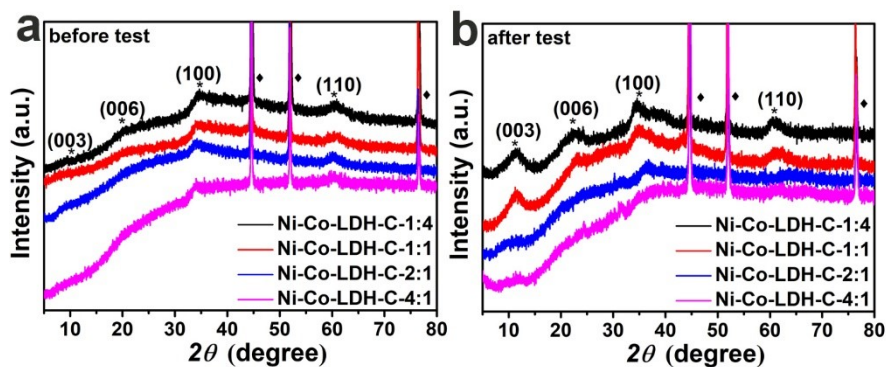

Figure S18 The XRD patterns of Ni-Co-LDH-C-1:4, Ni-Co-LDH-C-1:1, Ni-Co-LDH-C-2:1 and Ni-Co-LDH-C-4:1 electrodes (a) before and (b) after the cycling test at  $6 \text{ A g}^{-1}$ . Note that the peaks marked with \* and ◆ originate from Ni-Co-LDH-Cs and nickel foam, respectively.

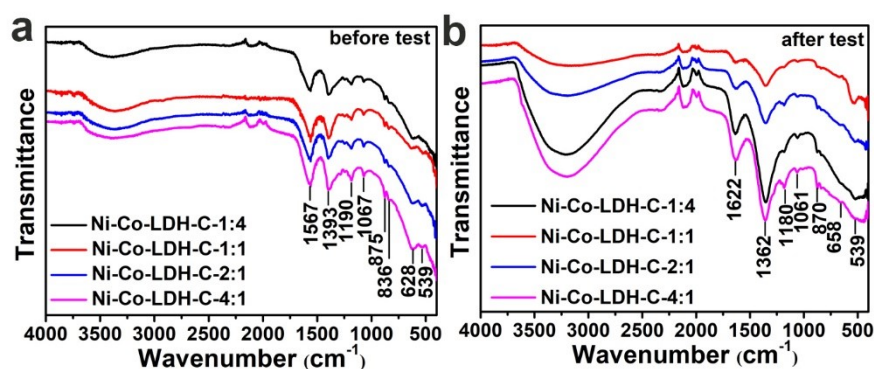

Figure S19 The FT-IR patterns of Ni-Co-LDH-C-1:4, Ni-Co-LDH-C-1:1, Ni-Co-LDH-C-2:1 and Ni-Co-LDH-C-4:1 electrodes (a) before and (b) after the cycling test at  $6 \text{ A g}^{-1}$ .

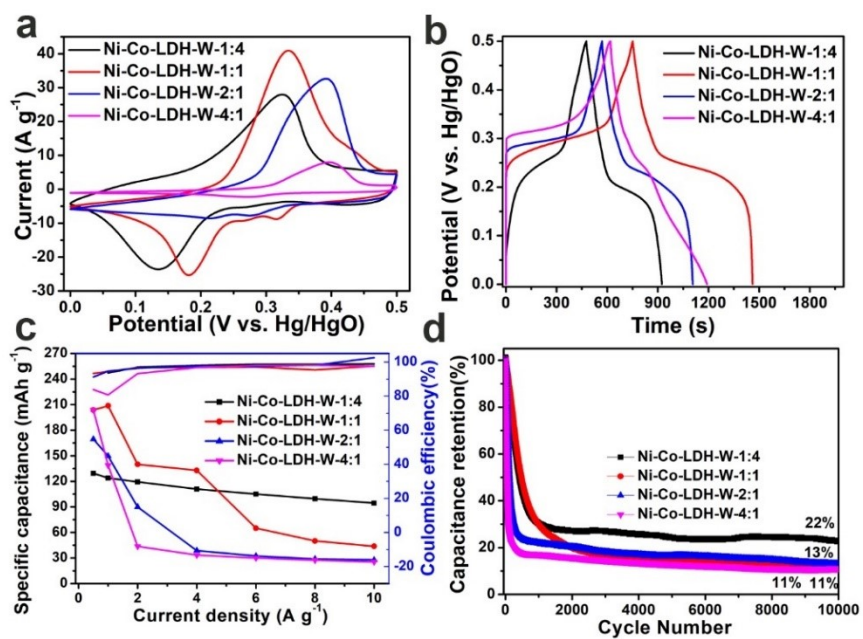

Figure S20 Electrochemical performances of Ni-Co-LDH-W-1:4, Ni-Co-LDH-W-1:1, Ni-Co-LDH-W-2:1 and Ni-Co-LDH-W-4:1 electrodes. (a) CV curves. (b) Galvanostatic charge/discharge curves at the current density of  $1\ A\ g^{-1}$ . (c) Rate capability and coulombic efficiency of the electrodes at current densities from  $0.5$  to  $10\ A\ g^{-1}$ . (d) Cycling performance at  $6\ A\ g^{-1}$ .

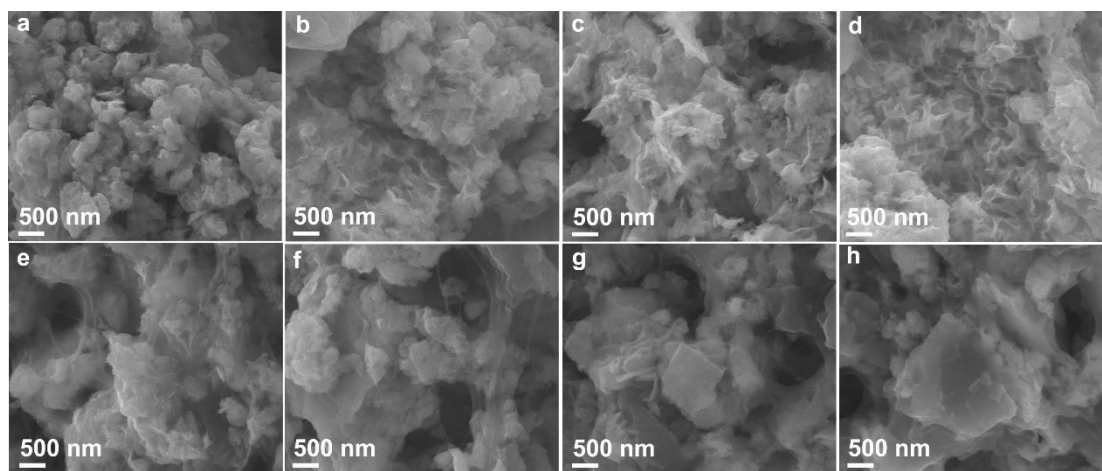

Figure S21 SEM images of Ni-Co-LDH-W-1:4, Ni-Co-LDH-W-1:1, Ni-Co-LDH-W-2:1 and Ni-Co-LDH-W-4:1 electrodes (a, b, c and d) and after the cycling test at  $6\ A\ g^{-1}$  (e, f, g and h).

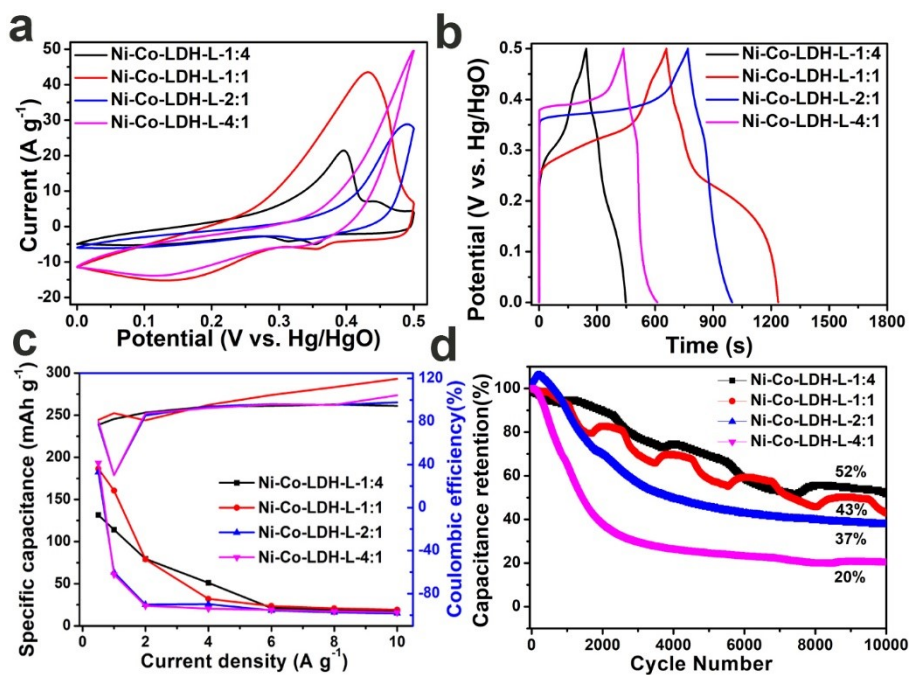

Figure S22 Electrochemical performances of Ni-Co-LDH-L-1:4, Ni-Co-LDH-L-1:1, Ni-Co-LDH-L-2:1 and Ni-Co-LDH-L-4:1 electrodes. (a) CV curves at 10 mV s<sup>-1</sup>. (b) GCD curves at 1 A g<sup>-1</sup>. (c) Rate capability and coulombic efficiency at different current densities. (d) Cycling performance at 6 A g<sup>-1</sup>.

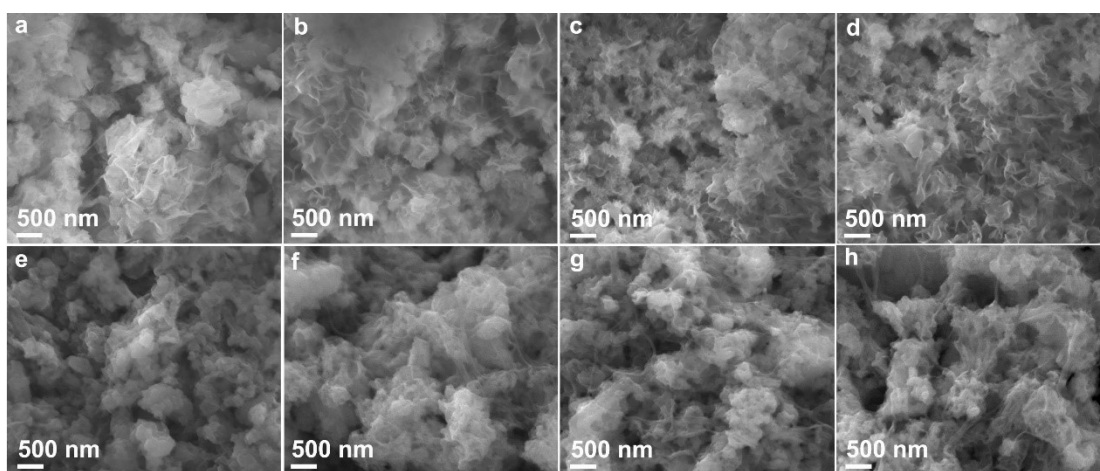

Figure S23 SEM images of Ni-Co-LDH-L-1:4, Ni-Co-LDH-L-1:1, Ni-Co-LDH-L-2:1 and Ni-Co-LDH-L-4:1 electrodes (a, b, c and d) and after the cycling test at 6 A g<sup>-1</sup> (e, f, g and h).



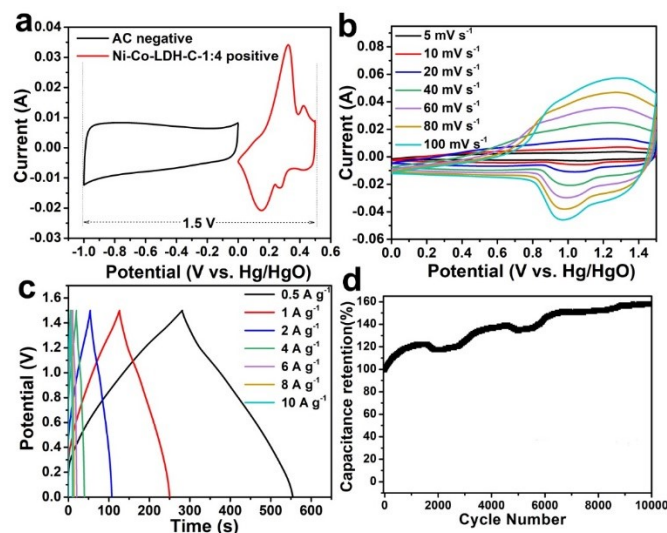

Figure. S24 (a) CV curves of the Ni-Co-LDH-C-1:4 as positive and AC negative electrodes performed in a three electrode system in 6 M KOH electrolyte at a scan rate of  $10 \text{ mV s}^{-1}$ . (b) CV curves of Ni-Co-LDH-C-1:4//AC at 0-1.5 V at various scan rates from 5 to  $100 \text{ mV s}^{-1}$ . (c) galvanostatic charge discharge curves of the device at the current densities between 0.5 and  $10 \text{ A g}^{-1}$ . (d) cycling performance with a voltage of 1.5 V at a current density of  $6 \text{ A g}^{-1}$ .

Table S4. Comparison with energy density between Ni-Co-LDH-C-1:4//AC and Ni-Co-LDH-M//AC of the present work and hybrid supercapacitors in literature.

| Hybrid Supercapacitor                            | Energy density @ Power density                        | Cycle life           | Reference        |
|--------------------------------------------------|-------------------------------------------------------|----------------------|------------------|
| Co-Al-O <sub>x</sub> /S <sub>y</sub> @LSCN//LSCN | 21.83 W h kg <sup>-1</sup> @374.28 W kg <sup>-1</sup> | 4000 cycles (106%)   | [11]             |
| MCS-MXene(1:2)//AC                               | 25.6 W h kg <sup>-1</sup> @6400 W kg <sup>-1</sup>    | 12 000 cycles (100%) | [12]             |
| P-NiWO <sub>4</sub> @CoWO <sub>4</sub> //AC      | 26.8 W h kg <sup>-1</sup> @824.6 W kg <sup>-1</sup>   | 4000 cycles (82%)    | [13]             |
| CuO/MoS <sub>2</sub> //BAC                       | 26.66 W h kg <sup>-1</sup> @1599.6 W kg <sup>-1</sup> | 5000 cycles (80%)    | [14]             |
| MIP-202 (350)//GO                                | 16.6 W h kg <sup>-1</sup> @40 kW kg <sup>-1</sup>     | 3000 cycles (86%)    | [15]             |
| HT-Ag/ZIF(H)//AC                                 | 8.5 W h kg <sup>-1</sup> @7037.04 W kg <sup>-1</sup>  | 3000 cycles (92%)    | [16]             |
| cPNF-73//NiCo <sub>2</sub> O <sub>4</sub>        | 1.74 W h kg <sup>-1</sup> @0.38 W kg <sup>-1</sup>    | 2000 cycles (83%)    | [17]             |
| CuCo <sub>2</sub> O <sub>4</sub> /OMEP//AC       | 11.6 W h kg <sup>-1</sup> @8.33 kW kg <sup>-1</sup>   | 10 000 cycles (90%)  | [18]             |
| Ni-Co-LDH-C-1:4//AC                              | 28.34 W h kg <sup>-1</sup> @373.53 W kg <sup>-1</sup> | 10 000 cycles (158%) | <b>This work</b> |
| Ni-Co-LDH-M//AC                                  | 15.64 W h kg <sup>-1</sup> @280.06 W kg <sup>-1</sup> | 10 000 cycles (97%)  |                  |

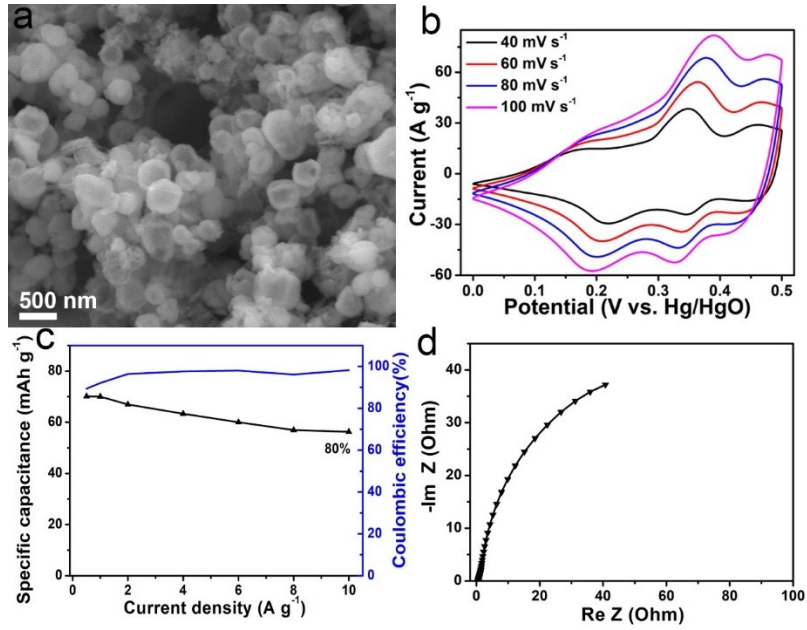

Figure S25 Electrochemical performances of Ni-Co-LDH-M electrode. (a) SEM image. (b) CV curves at different scan rates. (c) Rate capability and coulombic efficiency at different current densities. (d) Nyquist plot.

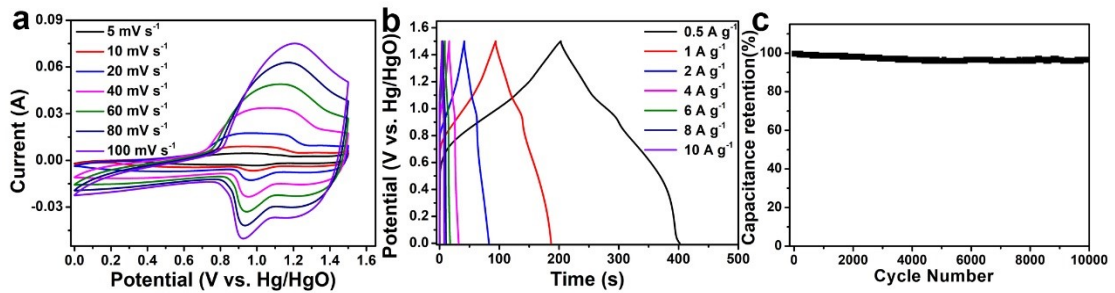

Figure. S26 (a) CV curves of Ni-Co-LDH-M//AC at 0-1.5 V at various scan rates from 5 to 100 mV s<sup>-1</sup>. (b) Galvanostatic charge discharge curves of the device at the current densities between 0.5 and 10 A g<sup>-1</sup>. (c) Cycling performance with a voltage of 0-1.5 V at a current density of 6 A g<sup>-1</sup>.

## References

- [1] D. Gong, H. Tong, J. Xiao, T. Li, J. Liu, Y. Wu, X. Chen, J. Liu, X. Zhang, Self-standing manganese dioxide/graphene carbon nanotubes film electrode for symmetric supercapacitor with high energy density and superior long cycling stability, *Ceramics International* 47 (2021) 33020-33027.
- [2] M. Sajjad, J. Ismail, A. Shah, A. Mahmood, M.Z.U. Shah, S.u. Rahman, W. Lu, Fabrication of 1.6 V hybrid supercapacitor developed using  $\text{MnSe}_2/\text{rGO}$  positive electrode and phosphine based covalent organic frameworks as a negative electrode enables superb stability up to 28,000 cycles, *Journal of Energy Storage* 44 (2021) 103318.
- [3] R. Han, L. Guan, S. Zhang, Y. Lin, J. Tao, Boosted cycling stability of CoP nano-needles based hybrid supercapacitor with high energy density upon surface phosphorization, *Electrochimica Acta* 368 (2021) 137690.
- [4] W. Wu, C. Zhao, C. Wang, T. Liu, L. Wang, J. Zhu, Hierarchical structure of Self-Supported  $\text{NiCo}_2\text{S}_4$  Nanoflowers@ $\text{NiCo}_2\text{S}_4$  nanosheets as high rate-capability and cycling-stability electrodes for advanced supercapacitor, *Applied Surface Science* 563 (2021) 150324.
- [5] A.K. Das, U.N. Pan, V. Sharma, N.H. Kim, J.H. Lee, Nanostructured  $\text{CeO}_2/\text{NiV-LDH}$  composite for energy storage in asymmetric supercapacitor and as methanol oxidation electrocatalyst, *Chemical Engineering Journal* 417 (2021) 128019.
- [6] L. Xie, S. Chen, Y. Hu, Y. Lan, X. Li, Q. Deng, J. Wang, Z. Zeng, S. Deng, Construction of phosphatized cobalt nickel-LDH nanosheet arrays as binder-free electrode for high-performance battery-like supercapacitor device, *Journal of Alloys and Compounds* 858 (2021) 157652.
- [7] H. Liu, J. Zhu, Z. Li, Z. Shi, J. Zhu, H. Mei,  $\text{Fe}_2\text{O}_3/\text{N}$  doped rGO anode hybridized with  $\text{NiCo-LDH}/\text{Co}(\text{OH})_2$  cathode for battery-like supercapacitor, *Chemical Engineering Journal* 403 (2021) 126325.
- [8] F. Zhu, W. Liu, Y. Liu, W. Shi, Construction of porous interface on  $\text{CNTs}@/\text{NiCo-LDH}$  core-shell nanotube arrays for supercapacitor applications, *Chemical Engineering Journal* 383 (2020) 123150.
- [9] Y. Guo, X. Hong, Y. Wang, Q. Li, J. Meng, R. Dai, X. Liu, L. He, L. Mai, Multicomponent Hierarchical Cu-Doped  $\text{NiCo-LDH}/\text{CuO}$  Double Arrays for Ultralong-Life Hybrid Fiber Supercapacitor, *Advanced Functional Materials* 29 (2019).
- [10] Y. Wang, F. Zheng, Q. Pan, D. Deng, L. Liu, B. Chen, A three-dimensional  $\text{NiCo-LDH}$  array modified halloysite nanotube composite for high-performance battery-type supercapacitor, *Journal of Alloys and Compounds* 884 (2021) 161162.
- [11] C. Jiang, M. Yao, Z. Wang, J. Li, Z. Sun, L. Li, K.S. Moon, C.P. Wong, A novel flower-like architecture comprised of 3D interconnected Co-Al-Ox/Sy decorated lignosulfonate-derived carbon nanosheets for flexible supercapacitors and electrocatalytic water splitting, *Carbon* 184 (2021) 386-399.
- [12] K. Nasrin, K. Subramani, M. Karnan, M. Sathish,  $\text{MnCo}_2\text{S}_4\text{-MXene}$ : A novel hybrid electrode material for high performance long-life asymmetric supercapattery, *Journal of Colloid and Interface Science* 600 (2021) 264-277.
- [13] W. Miao, Q. Han, H. Zhang, K. Chen, L. Zhang, Y. Li, S. Han, Uniform phosphorus doped  $\text{CoWO}_4@/\text{NiWO}_4$  nanocomposites for asymmetric supercapacitors, *Journal of Alloys and Compounds* 877 (2021) 160301.
- [14] G.P. Awasthi, M.B. Poudel, M. Shin, K.P. Sharma, H.J. Kim, C. Yu, Facile synthesis of a copper oxide/molybdenum disulfide heterostructure for asymmetric supercapacitors of high specific energy,

Journal of Energy Storage 42 (2021) 103140.

- [15] M. Rad, S. Borhani, M. Moradi, V. Safarifard, Tuning the crystallinity of ZrO<sub>2</sub> nanostructures derived from thermolysis of Zr-based aspartic acid/succinic acid MOFs for energy storage application, *Physica E: Low-dimensional Systems and Nanostructures* 134 (2021) 114921.
- [16] M. Pooriraj, M. Moradi, S. Hajati, Impact of silver incorporation on cobalt rich 3-D porous carbon arising from solid state thermolysis of ZIF-67 as a pseudocapacitor electrode: Improvement of diffusion-controlled charge storage, *Solid State Ionics* 368 (2021) 115697.
- [17] M.J. Ma, J.G. Seong, S. Radhakrishnan, T.H. Ko, B.S. Kim, Preparation of Network-Structured Carbon Nanofiber Mats Based on PAN Blends Using Electrospinning and Hot-Pressing Methods for Supercapacitor Applications, *Nanomaterials (Basel)* 11 (2021).
- [18] M. Li, Z. Meng, R. Feng, K. Zhu, F. Zhao, C. Wang, J. Wang, L. Wang, P.K. Chu, Fabrication of Bimetallic Oxides (MCo<sub>2</sub>O<sub>4</sub>: M=Cu, Mn) on Ordered Microchannel Electro-Conductive Plate for High-Performance Hybrid Supercapacitors, *Sustainability* 13 (2021).
